# Supplementary material for: Growth and properties of ZnO nanorods by RF-sputtering for detection of toxic gases
Source: Royal Society of Chemistry journal article supplement (doi:10.1039/c8ra05357j), 2018-01-01
Supplement: c8ra05357j1.pdf [file c8ra05357j1.pdf]

Supplementary information to the paper “Growth and properties of ZnO nanorods by RF-sputtering for detection of toxic gases” by Camilla Baratto

Figure S1 reports the fit of the calibration curves presented in Fig. 6 (a) and (c) at 500°C for the sensors ZNOS10 and ZNOS12, which are the better sensors for H<sub>2</sub>S. The experimental data were fitted by a power law:

$$\text{Response} = A * [\text{concentration}]^B.$$

Extrapolation of the fit to the axis limit shows that the limit of detection (LOD) for ZNOS10, is 0.1 ppm and for ZNOS12 is 0.2 ppm.

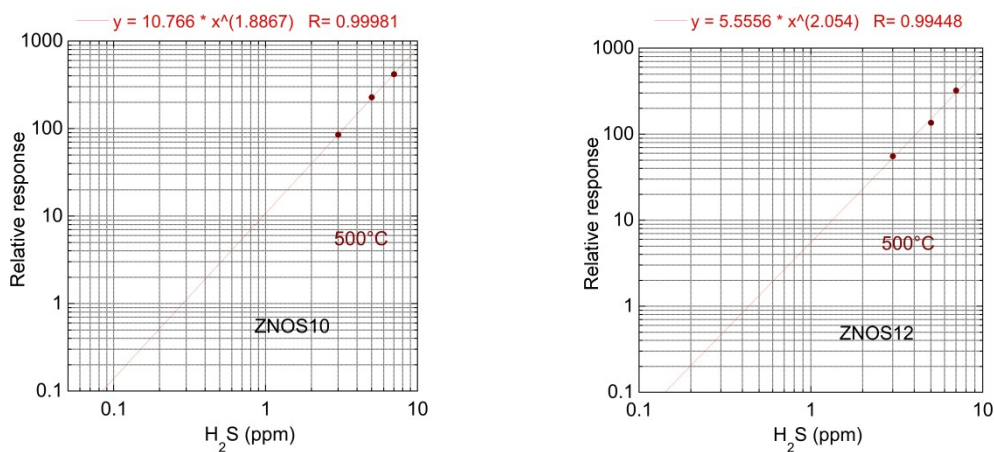

Fig. S1: Fit of the calibration curves for (Left) ZnOS10; (Right) ZnOS12 at 500°C.
